# Supplementary material for: Nanoparticle-Based Therapeutic Strategies for Enhanced Pancreatic Ductal Adenocarcinoma Immunotherapy
Source: MDPI journal article supplement (doi:10.3390/pharmaceutics14102033), 2022-09-24
Supplement: s1 [file s1]

**Supplement Table S1.** Published clinical trials of other immunotherapy in PDAC.

|                                     | Therapeutic strategy                                                                               | Phase | Stage                          | Number of Patients | Objective Response Rate | Median PFS(mon<br>ths) | Median OS(months<br>) | immune-<br>related adverse<br>events (≥ grade<br>3) | Publicat<br>ion year | NCT<br>number   | Ref                   |
|-------------------------------------|----------------------------------------------------------------------------------------------------|-------|--------------------------------|--------------------|-------------------------|------------------------|-----------------------|-----------------------------------------------------|----------------------|-----------------|-----------------------|
| <b>Cance<br/>r<br/>vaccin<br/>e</b> | mutant ras peptides+GM-CSF                                                                         | I/II  | PDAC                           | 48                 | NA                      | NA                     | NA                    | NA                                                  | 2001                 | NA              | PMID:<br>112910<br>84 |
|                                     | GEM+TG01/GM-CSF                                                                                    | I/II  | resected<br>RAS-mutant<br>PDAC | 32                 | NA                      | NA                     | 34.3                  | NA                                                  | 2020                 | NCT022617<br>14 | PMID:<br>320636<br>05 |
|                                     | GVAX+ipilimumab<br>vs<br>FOLFIRINOX                                                                | II    | mPDAC                          | 40 vs 42           | NA                      | 2.4 vs<br>5.55         | 9.8 vs 14.7           | 36% (ipi<br>3mg/kg) vs<br>44% (ipi<br>10mg/kg)      | 2020                 | NCT018968<br>69 | PMID:<br>325914<br>64 |
|                                     | GVAX                                                                                               | II    | resectable<br>PDAC             | 60                 | NA                      | 17.3                   | 24.8                  | NA                                                  | 2011                 | NCT000843<br>83 | PMID:<br>212175<br>20 |
|                                     | Cy(cyclophosphamide)/GVAX<br>+ CRS-207 + nivolumab<br>vs<br>Cy(cyclophosphamide)/GVAX<br>+ CRS-207 | II    | mPDAC                          | 51 vs 42           | 4% vs 2%                | NA                     | 5.9 vs 6.1            | 35.3%vs11.9%                                        | 2020                 | NCT022433<br>71 | PMID:<br>299972<br>87 |

|  |                                                                                                                                                                                                          |     |                 |                |                                 |                   |                   |                     |      |             |                   |
|--|----------------------------------------------------------------------------------------------------------------------------------------------------------------------------------------------------------|-----|-----------------|----------------|---------------------------------|-------------------|-------------------|---------------------|------|-------------|-------------------|
|  | Cy/GVAX followed by four doses of CRS-207<br>vs<br>Cy/GVAX followed by six doses of Cy/GVAX                                                                                                              | II  | mPDAC           | 62 vs 29       | NA                              | NA                | 6.1 vs 3.9        | NA                  | 2015 | NCT01417000 | PMID:<br>25584002 |
|  | GVAX<br>vs<br>GVAX+cyclophosphamide at 200 mg/m2 one day before each vaccination<br>vs<br>GVAX+cyclophosphamide at 100 mg once daily for one week on and one week off starting on the day of vaccination | II  | resectable PDAC | 22 vs 23 vs 21 | NA                              | NA                | 34.2vs15.4vs16.5  | NA                  | 2021 | NCT00727441 | PMID:<br>33277370 |
|  | GVAX+CRS-207(live, attenuated Listeria monocytogenes expressing mesothelin)<br>vs<br>CRS-207<br>vs<br>single-agent chemotherapy                                                                          | IIb | mPDAC           | 68 vs 58 vs 43 | SD +PR: 23.5% vs 13.8% vs 11.6% | 2.3 vs 2.1 vs 2.1 | 3.7 vs 5.4 vs 4.6 | 46.8%vs36.8%vs27.8% | 2019 | NCT02004262 | PMID:<br>31126960 |
|  | Nab-P+GEM+IL-2+GM-CSF                                                                                                                                                                                    | II  | advanced PDAC   | 64             | 43.75%                          | 5.7               | 14.2              | 59.38%              | 2021 | NCT03768687 | PMID:<br>34722242 |

|  |                                                                                                    |                            |                                              |                    |              |                                                          |                                                   |            |      |                   |                       |
|--|----------------------------------------------------------------------------------------------------|----------------------------|----------------------------------------------|--------------------|--------------|----------------------------------------------------------|---------------------------------------------------|------------|------|-------------------|-----------------------|
|  | ipilimumab<br>vs<br>ipilimumab+GVAX                                                                | Ib                         | previously<br>treated PDAC                   | 15 vs 15           | 3 SD vs 2 SD | NA                                                       | 3.6 vs 5.7                                        | 20% vs 20% | 2014 | NCT008364<br>07   | PMID:<br>239247<br>90 |
|  | chemotherapy<br>vs<br>chemotherapy+sequential<br>GV1001<br>vs<br>chemotherapy+concurrent<br>GV1001 | III                        | locally<br>advanced or<br>metastatic<br>PDAC | 358 vs 350 vs 354  | NA           | NA                                                       | 7.9 vs 6.9<br>vs 8.4                              | NA         | 2014 | ISRCTN43<br>82138 | PMID:<br>249547<br>81 |
|  | KIF20A-66 peptide                                                                                  | I                          | advanced<br>pancreatic<br>cancer             | 29                 | DCR 72%(SD)  | 56 days                                                  | 142days                                           | NA         | 2013 | UMIN0000<br>04919 | PMID:<br>242376<br>33 |
|  | DC vaccines                                                                                        | I                          | metastatic or<br>unresectable<br>PDAC        | 12                 | NA           | 3                                                        | 7.7                                               | NA         | 2017 | NCT014109<br>68   | PMID:<br>283889<br>66 |
|  | DC-CIK+S-1<br>vs<br>DC-CIK<br>vs<br>chemotherapy<br>vs<br>supportive care                          | A<br>Prospecti<br>ve Study | advanced<br>pancreatic<br>cancer             | 25 vs 11 vs 4 vs 7 | NA           | 136 days<br>vs 85<br>days vs<br>92 days<br>vs 43<br>days | 212 days vs<br>128days vs<br>141days vs<br>52days | 0          | 2017 | NCT017815<br>20   | PMID:<br>286112<br>00 |

|  |                                                                                                 |                            |                                                                                            |            |                                                                                 |                 |              |            |      |                 |                       |
|--|-------------------------------------------------------------------------------------------------|----------------------------|--------------------------------------------------------------------------------------------|------------|---------------------------------------------------------------------------------|-----------------|--------------|------------|------|-----------------|-----------------------|
|  | DC vaccine+GEM+/S-1<br>vs<br>DC<br>vaccine+lymphokine-activated<br>killer cell therapy+GEM+/S-1 | retrospec<br>tive<br>study | advanced<br>pancreatic<br>carcinoma                                                        | 15 vs 34   | 0%(CR) vs<br>5.9%(CR);<br>13.3%(PR) vs<br>8.8%(PR);<br>6.7%(SD) vs<br>26.5%(SD) | NA              | NA           | 0          | 2012 | NA              | PMID:<br>217920<br>83 |
|  | chemoradiotherapy+algenpantuc<br>el-L                                                           | II                         | resected<br>pancreatic<br>cancer                                                           | 70         | NA                                                                              | NA              | NA           | <12%       | 2013 | NCT005693<br>87 | PMID:<br>232298<br>86 |
|  | neoadjuvant<br>chemotherapy+chemoradiation<br>vs<br>neoadjuvant<br>chemotherapy+algenpantucel-L | III                        | Borderline<br>Resectable or<br>Locally<br>Advanced<br>Unresectable<br>Pancreatic<br>Cancer | 158 vs 145 | NA                                                                              | 13.4 vs<br>12.4 | 14.9 vs 14.3 | 75% vs 81% | 2022 | NCT018364<br>32 | PMID:<br>336304<br>75 |
|  | K-ras vaccine                                                                                   | I/II                       | resected PDAC                                                                              | 23         | NA                                                                              | NA              | 27.5         | 0%         | 2010 | NA              | PMID:<br>204739<br>37 |
|  | WT1 and/or<br>MUC1 peptide-loaded DC<br>vaccination+chemotherapy                                | I/II                       | advanced<br>pancreatic<br>cancer                                                           | 48         | 14.6%                                                                           | 8.1             | 15.1         | 0%         | 2021 | NA              | PMID:<br>349194<br>93 |
|  | TG01/GM-CSF+GEM                                                                                 | I/II                       | patients with<br>resected<br>RAS-mutant<br>adenocarcinoma                                  | 32         | 94% immune<br>response                                                          | NA              | 33.3         | NA         | 2020 | NCT022617<br>14 | PMID:<br>320636<br>05 |

|                        |                                                       |    |                                             |    |                                                                                                                      |     |      |                             |      |             |                |
|------------------------|-------------------------------------------------------|----|---------------------------------------------|----|----------------------------------------------------------------------------------------------------------------------|-----|------|-----------------------------|------|-------------|----------------|
|                        |                                                       |    | of the pancreas                             |    |                                                                                                                      |     |      |                             |      |             |                |
| <b>CART</b>            | mesothelin-specific CART                              | I  | chemotherapy-refractory metastatic PDAC     | 6  | Disease stabilized in 2 patients, with progression-free survival times of 3.8 and 5.4 months                         | NA  | NA   | no dose limiting toxicities | 2018 | NA          | PMID: 29567081 |
|                        | CAR T-EGFR                                            | I  | metastatic pancreatic carcinoma             | 16 | Of 14 evaluable patients, four achieved partial response for 2-4 months, and eight had stable disease for 2-4 months | 3.0 | 4.9  | NA                          | 2020 | NCT01869166 | PMID: 32527643 |
| <b>Oncolytic virus</b> | pembrolizumab+oncolytic virus pelareorep+chemotherapy | Ib | advanced pancreatic adenocarcinoma          | 11 | 9%                                                                                                                   | 2.0 | 3.1  | 9.1%                        | 2020 | NA          | PMID: 31694832 |
| <b>ACT</b>             | MUC1-DCs+MUC1-CTLs+GEM                                | NA | unresectable or recurrent pancreatic cancer | 42 | CR:2.4%;PR:7.1%;SD:52.4%                                                                                             | NA  | 13.9 | NA                          | 2014 | NA          | PMID: 24947606 |
|                        | MUC1-DC+cytotoxic T lymphocyte (CTL)                  | NA | unresectable or recurrent pancreatic        | 20 | 1 patient CR; 5 patients SD                                                                                          | NA  | 9.8  | 0%                          | 2008 | NA          | PMID: 18383873 |

|                |                                                                              |    |                                               |                                                                                                  |                                                                                                          |                                                          |                                                                |                                                                                         |      |                                                                                       |                |
|----------------|------------------------------------------------------------------------------|----|-----------------------------------------------|--------------------------------------------------------------------------------------------------|----------------------------------------------------------------------------------------------------------|----------------------------------------------------------|----------------------------------------------------------------|-----------------------------------------------------------------------------------------|------|---------------------------------------------------------------------------------------|----------------|
|                |                                                                              |    | cancer                                        |                                                                                                  |                                                                                                          |                                                          |                                                                |                                                                                         |      |                                                                                       |                |
|                | GEM+autologous $\gamma\delta$ T-cell transfer<br>vs<br>GEM                   | I  | curatively resected pancreatic cancer         | 28 vs 20                                                                                         | NA                                                                                                       | NA                                                       | NA                                                             | NA                                                                                      | 2017 | University Hospital Medical Information Clinical Trials Registry identifier 000000931 | PMID: 28188072 |
| <b>NK cell</b> | irreversible electroporation (IRE)<br>vs<br>IRE-NK                           | NA | unresectable (stage III/IV) pancreatic cancer | 16 vs 19                                                                                         | Stage III:50.0% vs 63.2%;<br>Stage IV:21.4% vs 26.3%;                                                    | 7.9 vs 9.1                                               | 12.2 vs 13.6                                                   | NA                                                                                      | 2017 | NA                                                                                    | PMID: 28871458 |
| <b>CD40</b>    | CP-870,893(anti-CD40)+GEM                                                    | I  | advanced PDAC                                 | 22                                                                                               | 19%, 4 PR                                                                                                | 5.2                                                      | 8.4                                                            | NA                                                                                      | 2013 | NA                                                                                    | PMID: 33497362 |
|                | APX005M(anti-CD40)+GEM+Nab-P<br>vs<br>APX005M(anti-CD40)+GEM+Nab-P+nivolumab | Ib | mPDAC                                         | 6 (0.1 mg/kg APX005M);<br>6 (0.3 mg/kg APX005M);<br>vs<br>6 (0.1 mg/kg APX005M);<br>6 (0.3 mg/kg | 67% (0.1 mg/kg APX005M);<br>33% (0.3 mg/kg APX005M);<br>vs<br>67% (0.1 mg/kg APX005M);<br>67% (0.3 mg/kg | 12.5 (0.1 mg/kg APX005 M);<br>10.4 (0.3 mg/kg APX005 M); | 12.7 (0.1 mg/kg APX005M)<br>;<br>20.1 (0.3 mg/kg APX005M)<br>; | 85% (0.1 mg/kg APX005M);<br>100% (0.3 mg/kg APX005M);<br>vs<br>88% (0.1 mg/kg APX005M); | 2021 | NCT03214250                                                                           | PMID: 33387490 |

|            |                                                                   |       |                          |                                                             |                      |                                                                                 |                                                                                         |                                |      |                 |                       |
|------------|-------------------------------------------------------------------|-------|--------------------------|-------------------------------------------------------------|----------------------|---------------------------------------------------------------------------------|-----------------------------------------------------------------------------------------|--------------------------------|------|-----------------|-----------------------|
|            |                                                                   |       |                          | APX005M);                                                   | APX005M)             | vs<br>10.8 (0.1<br>mg/kg<br>APX005<br>M);<br>12.4 (0.3<br>mg/kg<br>APX005<br>M) | vs<br>15.9 (0.1<br>mg/kg<br>APX005M)<br>;<br>not<br>estimable<br>(0.3 mg/kg<br>APX005M) | 100% (0.3<br>mg/kg<br>APX005M) |      |                 |                       |
|            | sotigalimab(anti-CD40)+nivolumab                                  | II    | mPDAC                    | 37(nivo/chemo)vs31(sotiga/chemo)vs<br>31(sotiga/nivo/chemo) | 50% vs 33% vs<br>31% | 6.4 vs 7.3<br>vs 6.7                                                            | 16.7 vs 11.4<br>vs 10.1                                                                 | NA                             | 2022 | NCT032142<br>50 | PMID:<br>356622<br>83 |
| Other<br>s | ibrutinib (BTK inhibitor)+durvalumab                              | Ib/II | relapsed/refractory PDAC | 49                                                          | 2%                   | 1.7                                                                             | 4.2                                                                                     | 78%                            | 2019 | NCT024010<br>48 | PMID:<br>312300<br>47 |
|            | acalabrutinib (BTK inhibitor) vs<br>acalabrutinib + pembrolizumab | II    | advanced PDAC            | 37 vs 40                                                    | 0%                   | 1.4                                                                             | NA                                                                                      | 14.3% vs<br>15.8%              | 2020 | NCT023620<br>48 | PMID:<br>321145<br>02 |
|            | nivolumab + mogamulizumab<br>(Anti-CCR4)                          | I     | mPDAC                    | 15                                                          | 1/15                 | 1.8                                                                             | 6.5                                                                                     | NA                             | 2019 | NCT024761<br>23 | PMID:<br>314556<br>81 |
|            | PF-04136309 (CCR2 inhibitor)<br>+Nab-P+GEM                        | Ib    | mPDAC                    | 21                                                          | 23.8%                | NA                                                                              | NA                                                                                      | NA                             | 2020 | NCT027329<br>38 | PMID:<br>312976<br>36 |

|  |                                                                                 |      |                       |    |         |     |    |       |      |             |                |
|--|---------------------------------------------------------------------------------|------|-----------------------|----|---------|-----|----|-------|------|-------------|----------------|
|  | BL-8040 (CXCR4 inhibitor) + pembrolizumab + chemotherapy                        | IIa  | mPDAC                 | 22 | 0.27%   | NR  | NR | NA    | 2020 | NCT02826486 | PMID: 32451495 |
|  | irreversible electroporation+nivolumab                                          | Ib   | locally advanced PDAC | 10 | NA      | 6.3 | 18 | 70%   | 2020 | NCT03080974 | PMID: 32631655 |
|  | Neoadjuvant Oregovomab(CA125 monoclonal antibody)-Based Chemoimmunotherapy+SBRT | I/II | locally advanced PDAC | 11 | 3CR;4SD | 8.6 | 13 | 54.5% | 2019 | NA          | PMID: 31513018 |

GM-CSF: Granulocyte macrophage colony stimulating factor; GVAX: GM-CSF cell-based vaccines; GEM: gemcitabine; Nab-P: nab-paclitaxel; LAPC: locally advanced pancreatic cancer; mPDAC: metastatic pancreatic ductal adenocarcinoma; SBRT: stereotactic body radiation therapy; NA: not available .
